# Supplementary material
Source: PubMed Central journal article supplement (PMC5818747)
Supplement: PRO-27-780-s001.pdf [file PRO-27-780-s001.pdf]

### **Protein Construct Sequences**

The following amino acid sequence of ApoA-I protein was used in the cell-free experiments:

MSGSHHHHHSSGIEGRGLIKHMLNLENWDTLGSTVSQLQERLGPLTRDFWDNLEKETDWVRQEMNKDLEEVKQ  
KVQPYLDEFQKKWKEDVELYRQKVAPLGAELQESARQKLQELQGRLSPVAEEFRDRMRTHVDSLRTQLAPHSEQMRE  
SLAQLAELKSNPTLNEYHTRAKTHLKTGKARPALEDLRHSLMPMLETLKTKAQSVIDKASETTLTAQSG

The following amino acid sequence of ApoA-I protein was used in *in vitro* assembly experiments:

MHHHHHHGENLYFQGMLNLENWDTLGSTVSQLQERLGPLTRDFWDNLEKETDWVRQEMNKDLEEVKQKVQPYL  
DEFQKKWKEDVELYRQKVAPLGAELQESARQKLQELQGRLSPVAEEFRDRMRTHVDSLRTQLAPHSEQMRESLAQL  
AELKSNPTLNEYHTRAKTHLKTGKARPALEDLRHSLMPMLETLKTKAQSVIDKASETTLTAQ

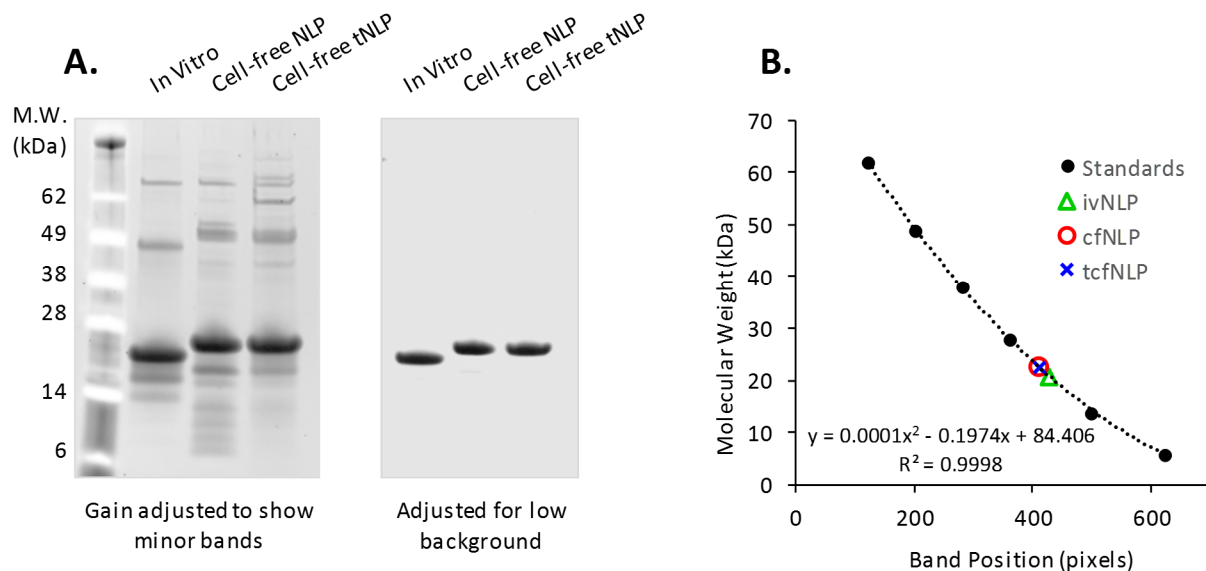

**Figure S1.** After initial IMAC purification, NLP preps were analyzed by SDS-PAGE using 4  $\mu\text{g}$  of ApoA-I per lane. **(A)** Gels were SYPRO\* stained, and imaged for 2 minutes at 600 nm using a LI-COR system. NLPs were >95% pure. **(B)** NLP band positions were compared to standards to verify their molecular weights. ApoA-I proteins used in cell-free and *in vitro* assembly experiments had apparent molecular weights of 22.4 kDa and 20.7 kDa, respectively. Calculated molecular weights based on primary sequence were 26.1 kDa and 25.1 kDa, respectively. The difference is within the level of variation typically seen in SDS-PAGE measurements.

\* Certain trade names and company products are identified in order to specify adequately the experimental procedure. In no case does such identification imply recommendation or endorsement by the National Institute of Standards and Technology, nor does it imply that the products are necessarily the best for the purpose.

## Model Calculations

The following equations relate molecular quantities and layer dimensions (which were the direct fitting parameters) to the layer SLDs (which are used internally in the scattering calculations for the “Core-Shell Bicelle Model” that is built in to SasView). Direct fitting parameters are shown in red. Parameters that vary as a function of fitting parameters are shown in blue. Constants are **black** and are fixed throughout fitting, but different values may be used for the different datasets, e.g. using scattering lengths appropriate to neutrons for SANS datasets or x-rays for SAXS datasets.

| <u>Equations</u>                                                                                                    | <u>Definitions</u>                                                                                                  |
|---------------------------------------------------------------------------------------------------------------------|---------------------------------------------------------------------------------------------------------------------|
| $\rho_c = \frac{N_l b_t}{\pi r_c^2 h_c}$                                                                            | $\rho_c$ SLD of the core                                                                                            |
| $f_{H_2O} = 1 - f_{D_2O}$                                                                                           | $N_l$ Number of DMPC lipids                                                                                         |
| $b_w = f_{D_2O} b_{D_2O} + f_{H_2O} b_{H_2O}$                                                                       | $b_t$ DMPC tail scattering length                                                                                   |
| $\rho_s = \frac{b_w}{V_w}$                                                                                          | $r_c$ Radius of hydrophobic core                                                                                    |
| $\rho_f = \frac{N_l (b_{hg} + N_w^{hg} b_w)}{2\pi r_c^2 h_f}$                                                       | $h_c$ Height of hydrophobic core                                                                                    |
| $r = r_c + t_R$                                                                                                     | $b_w$ Average scattering length of a water molecule at the specified fraction of D <sub>2</sub> O.                  |
| $\rho_R = \frac{N_{msp} (f_{D_2O} b_{msp}^D + f_{H_2O} b_{msp}^H + N_w^{msp} b_w)}{\pi (h_c + 2h_f) (r^2 - r_c^2)}$ | $f_{D_2O}$ Fraction (v/v) of D <sub>2</sub> O in the buffer                                                         |
|                                                                                                                     | $f_{H_2O}$ Fraction (v/v) of <sup>1</sup> H <sub>2</sub> O in the buffer                                            |
|                                                                                                                     | $b_{D_2O}$ Scattering length of a D <sub>2</sub> O molecule                                                         |
|                                                                                                                     | $b_{H_2O}$ Scattering length of a <sup>1</sup> H <sub>2</sub> O molecule                                            |
|                                                                                                                     | $\rho_s$ SLD of the solvent/buffer                                                                                  |
|                                                                                                                     | $V_w$ Volume of a water molecule                                                                                    |
|                                                                                                                     | $\rho_f$ SLD of the face                                                                                            |
|                                                                                                                     | $b_{hg}$ DMPC headgroup scattering length                                                                           |
|                                                                                                                     | $N_w^{hg}$ Number of waters per headgroup                                                                           |
|                                                                                                                     | $h_f$ Height of the face                                                                                            |
|                                                                                                                     | $r$ Outer radius of the disc                                                                                        |
|                                                                                                                     | $t_R$ Thickness of the rim                                                                                          |
|                                                                                                                     | $\rho_R$ SLD of the rim                                                                                             |
|                                                                                                                     | $N_{msp}$ Number of MSP molecules in the rim                                                                        |
|                                                                                                                     | $b_{msp}^D$ Scattering length of an MSP molecule with all exchangeable hydrogens fully occupied with D              |
|                                                                                                                     | $b_{msp}^H$ Scattering length of an MSP molecule with all exchangeable hydrogens fully occupied with <sup>1</sup> H |
|                                                                                                                     | $N_w^{msp}$ Number of waters per MSP                                                                                |

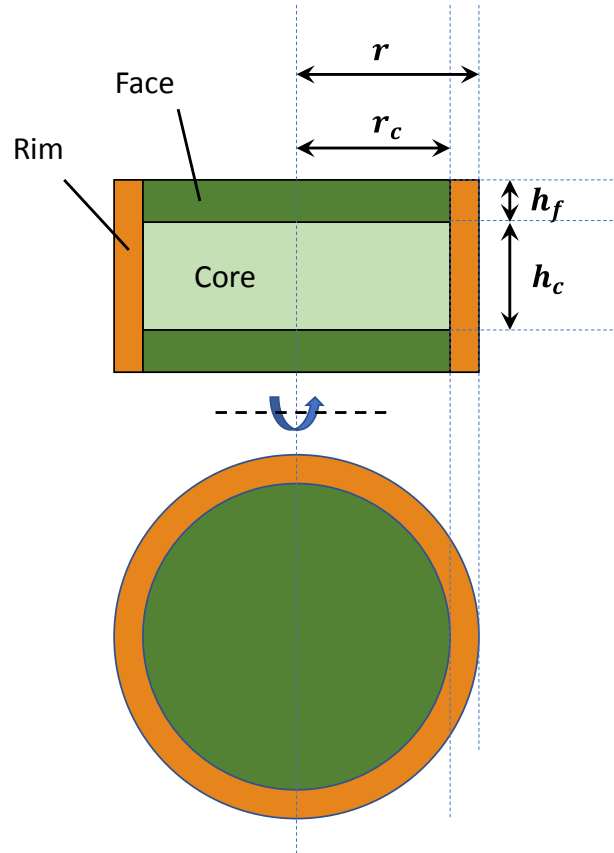

Figure S2. Model Schematic

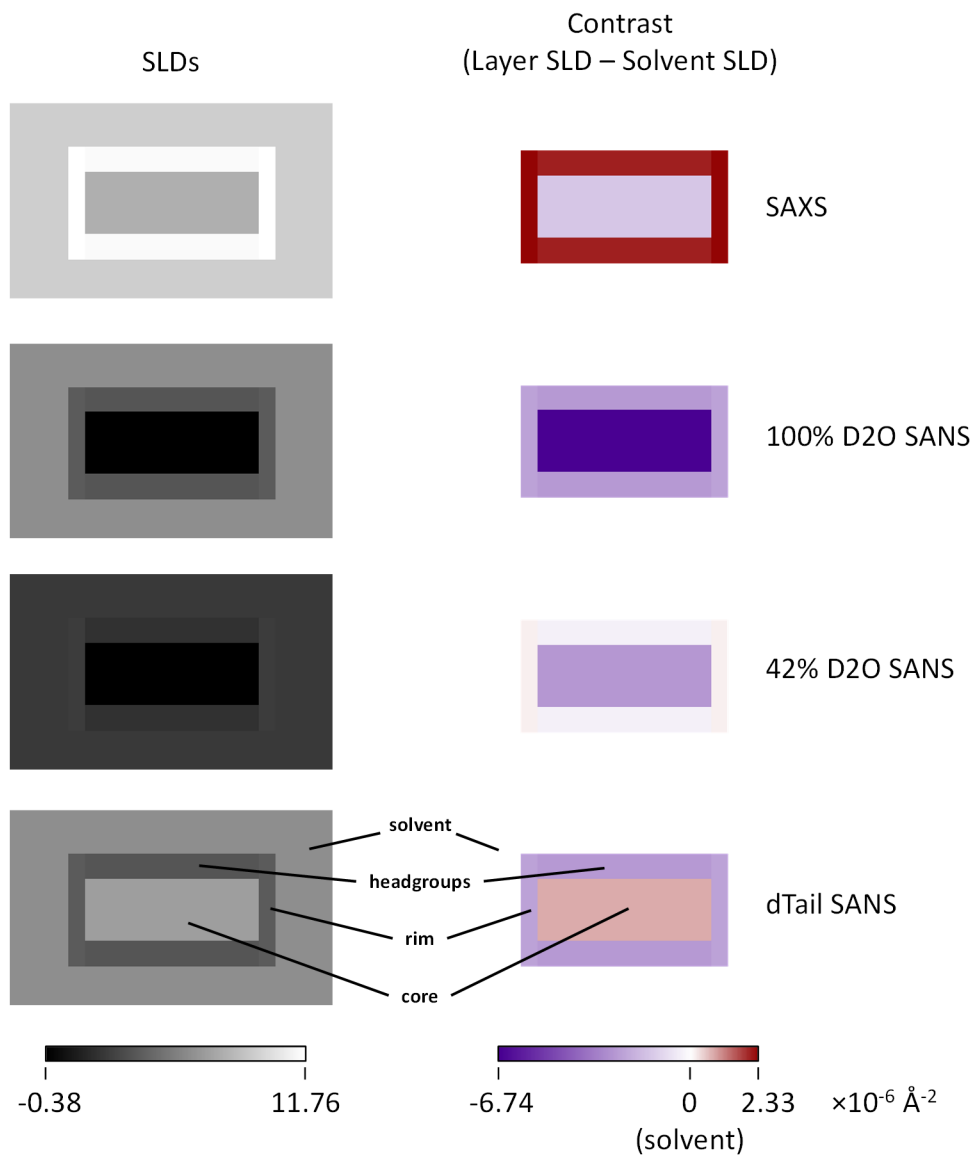

**Figure S3.** Accurately-scaled diagram of the final model geometry showing layer scattering length densities (SLDs) under the four data collection conditions: SAXS, SANS with 100% and 42% D<sub>2</sub>O buffer, and SANS in 100% D<sub>2</sub>O buffer on NLPs containing tail-deuterated DMPC lipids.
